# Supplementary material for: Network Effects of Demographic Transition
Source: PubMed Central journal article supplement (PMC6382786; doi:10.1038/s41598-019-39025-4), 2019-02-20
Supplement: 41598_2019_39025_MOESM1_ESM.pdf [file 41598_2019_39025_MOESM1_ESM.pdf]

**Supplementary Information for  
Network Effects of Demographic Transition  
Tamas David-Barrett**

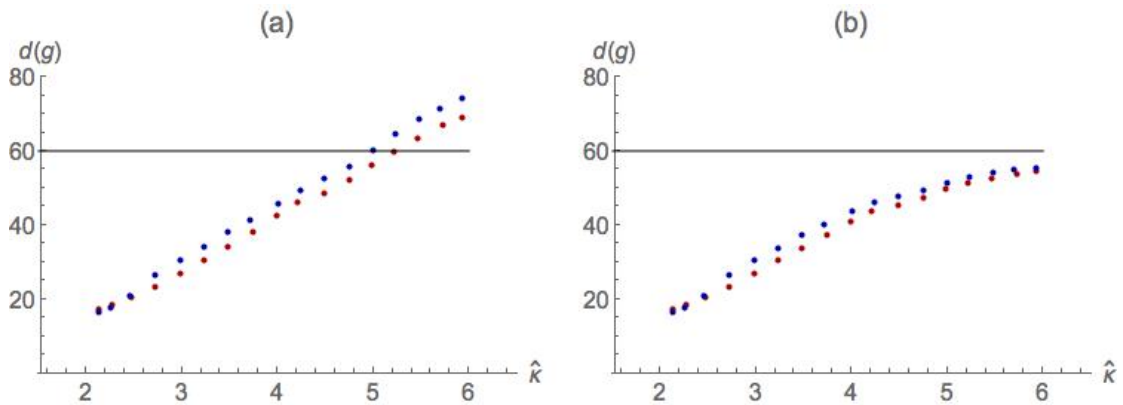

Fig. S1. The relationship between simulation fertility parameter,  $\kappa$ , and average degree number of relatives,  $d(g)$ . Panel (a): before truncation at 60; panel (b) after truncation. X-axis: the actual fertility in the population, i.e., measured after the standardisation of the population size to  $n=500$  or  $n=2000$ ; y-axis: number of relatives in the same generation (siblings or first degree cousins). Red:  $n=500$ , blue:  $n=2000$ . Each dot represents the average of the bin of the size 0.5 in terms of  $\kappa$ . The black horizontal line represents the truncation threshold.

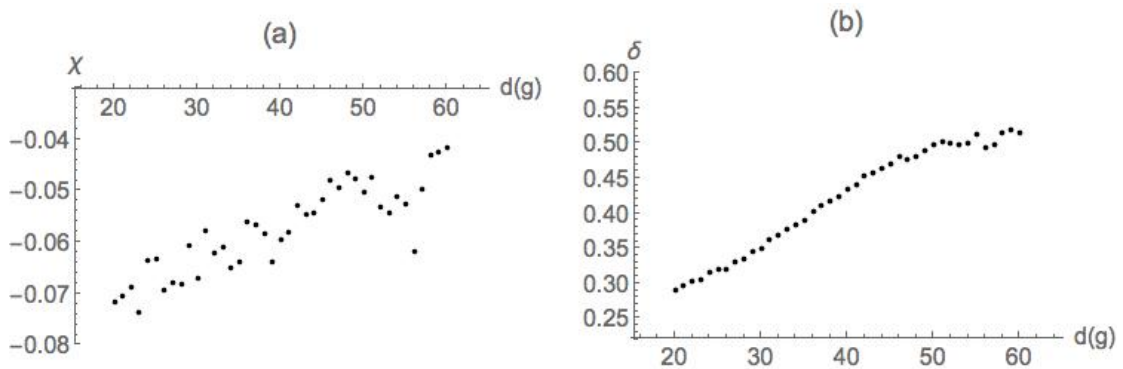

Fig. S2. Differentials of Fig.1 based on group size. Panel (a, b) x-axis: the number of relatives out of the maximum possible 60. Panel (a) y-axis: clustering coefficient differential:  $\chi_{2000}-\chi_{500}$ . Panel (b) y-axis: average graph distance differential:  $\delta_{2000}-\delta_{500}$ .
